# Supplementary material
Source: Springer Nature journal article supplement (https://www.springermedizin.de/resource/supplementary/12936_2013_3291_MOESM1_ESM.pdf/9545550)
Supplement: MOESM1 [file 9545550]

**1. Radio:**

More men than women were said to have better access to health information delivered through the radio

**3. Posters and brochures:**

Benefited men more than women because more women than men were said to be illiterate)

**2. Television:**

Never reached the study community because no one owned a television set

**4. Road shows:**

Never occurred in the study area

**5. Newspapers:**

Could not reach the study community, costly and pegged on literacy and high levels of education

**The Community**
